# Supplementary material
Source: publisher figshare collection journal article supplement (https://acs.figshare.com/ndownloader/files/9209278)
Supplement: Supplementary file 1 [file 9209278]

**Crystal structure of the thioesterase SgcE10 supporting common polyene intermediates  
in 9- and 10-membered enediyne core biosynthesis**

Thibault AnnaVal,<sup>1</sup> Jeffrey D. Rudolf<sup>1</sup>, Chin-Yuan Chang<sup>1</sup>, Jeremy R. Lohman<sup>1</sup>, Youngchang Kim<sup>2,3</sup>, Lance Bigelow<sup>2</sup>, Robert Jedrzejczak<sup>2</sup>, Gyorgy Babnigg<sup>2</sup>, Andrzej Joachimiak<sup>2,3,4</sup>, George N. Phillips, Jr.<sup>5</sup>, and Ben Shen<sup>1,6,7</sup>

<sup>1</sup>*Department of Chemistry, The Scripps Research Institute, 130 Scripps Way, Jupiter, FL 33458,  
United States*

<sup>2</sup>*Midwest Center for Structural Genomics and* <sup>3</sup>*Structural Biology Center, Biosciences Division,  
Argonne National Laboratory, 9700 South Cass Avenue, Argonne, IL 60439, United States*

<sup>4</sup>*Department of Biochemistry and Molecular Biology, University of Chicago, 929 E. 57th Street,  
W225, Chicago, IL 60637, United States*

<sup>5</sup>*BioSciences at Rice and Department of Chemistry, Rice University, 6100 Main St, Houston, TX  
77251, United States*

<sup>6</sup>*Department of Molecular Medicine and* <sup>7</sup>*Natural Products Library Initiative at The Scripps  
Research Institute, The Scripps Research Institute, 130 Scripps Way, Jupiter, FL 33458, United  
States*

**Supporting Information (SI)**

|                        |           |
|------------------------|-----------|
| <b>Figure S1.....</b>  | <b>S2</b> |
| <b>Figure S2.....</b>  | <b>S3</b> |
| <b>References.....</b> | <b>S3</b> |

**Figure S1.** Phylogenetic tree of the 102 full-length PKSE sequences from confirmed and predicted 9- and 10-membered enediynes biosynthetic machineries. The PKSEs from 9-membered enediyne (red) and 10-membered enediyne (blue) biosynthetic machineries show local, but not global, differentiation. Except for the 12 known enediynes (denoted by asterisks), the core size of each enediyne is predicted.<sup>1</sup> The three TEs, SgcE, DynE8, and CalE8 (denoted by black boxes), are marked with an asterisk. The sequence alignment was made with ClustaW, and the phylogenetic tree was constructed using the Maximum Likelihood method in MEGA 7.0.18.<sup>2</sup>

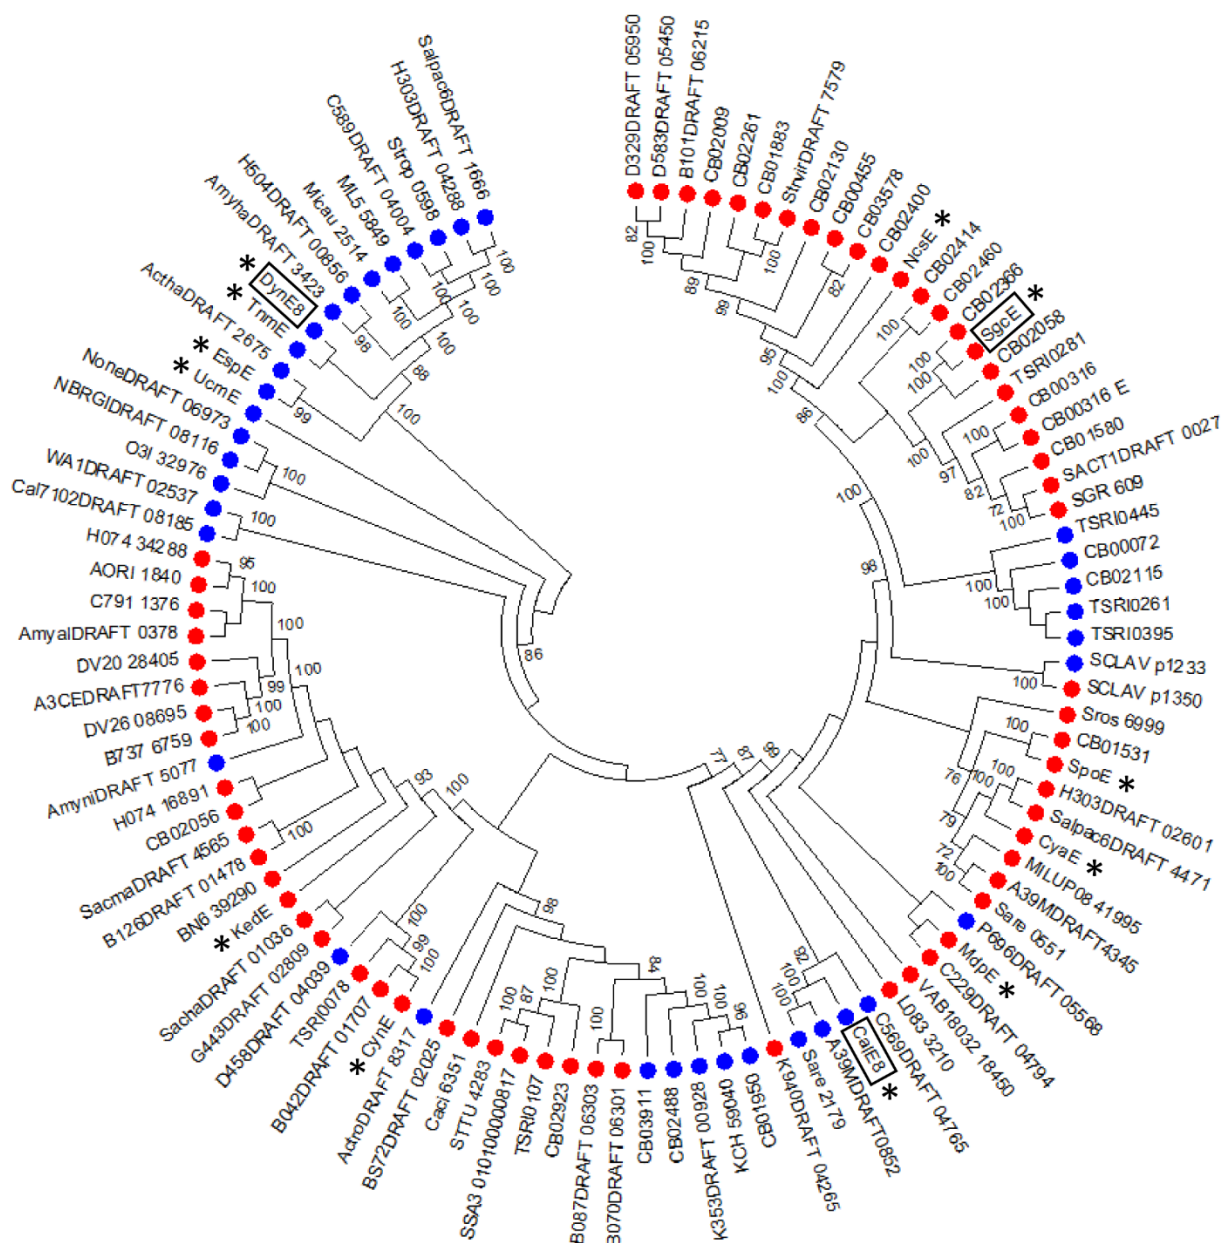

**Figure S2.** (A) Chromatogram of the analysis of SgcE10 by gel filtration. The protein exhibits a elution volume of 74.2 ml (B) The apparent molecule weight of SgcE10 is estimated to be 79.1kDa, suggesting that the protein (calculated molecular weight of 18.0 kDa) is tetrameric.

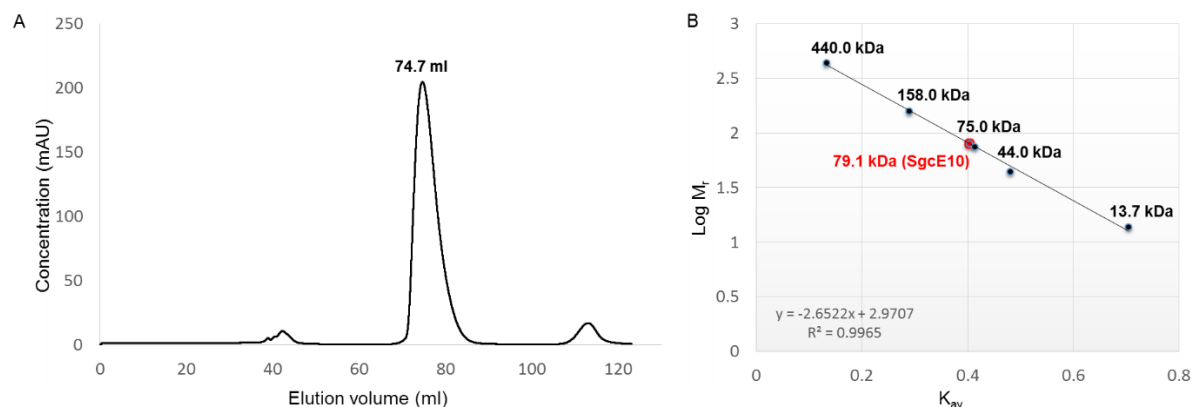

## References

1. Rudolf, J. D.; Yan, X.; Shen, B. Genome neighborhood network reveals insights into enediynes biosynthesis and facilitates prediction and prioritization for discovery. *J. Ind. Microbiol. Biotechnol.* **2016**, *43*, 261–276.
2. Kumar, S.; Stecher, G.; Tamura, K. MEGA7: Molecular Evolutionary Genetics Analysis Version 7.0 for Bigger Datasets. *Mol. Biol. Evol.* **2016**, *33*, 1870–1874.
